# Supplementary material for: Identification of the novel 3′ UTR sequences of human IL-21 mRNA as potential targets of miRNAs
Source: PubMed Central journal article supplement (PMC5552845; doi:10.1038/s41598-017-07853-x), 2017-08-10
Supplement: 41598_2017_7853_MOESM1_ESM.pdf [file 41598_2017_7853_MOESM1_ESM.pdf]

## Supplementary information

### **Identification of the novel 3' UTR sequences of human IL-21 mRNA as potential targets of miRNAs**

Yutaka Enomoto<sup>1,\*</sup>, Rie Takagi<sup>2,§</sup>, Yutaka Naito<sup>3,§</sup>, Tsuyoshi Kiniwa<sup>1</sup>, Yasuhito Tanaka<sup>4</sup>, Susumu Hamada-Tsutsumi<sup>4</sup>, Masaaki Kawano<sup>2</sup>, Sho Matsushita<sup>2</sup>, Takahiro Ochiya<sup>3</sup>, Atsushi Miyajima<sup>1,\*</sup>

<sup>1</sup>Laboratory of Cell Growth and Differentiation, Institute of Molecular and Cellular Biosciences, The University of Tokyo, 1-1-1 Yayoi, Bunkyo-ku, Tokyo, 113-0032, Japan

<sup>2</sup>Department of Allergy and Immunology Faculty of Medicine, Saitama Medical University, 38 Morohongo, Moroyama-cho, Iruma-gun, Saitama 350-0495, Japan

<sup>3</sup>Division of Molecular and Cellular Medicine, National Cancer Center Research Institute, 5-1-1 Tsukiji, Chuo-ku, Tokyo 104-0045, Japan

<sup>4</sup>Department of Virology and Liver Unit, Nagoya City University Graduate School of Medical Sciences, 1 Kawasumi, Mizuho-ku, Nagoya, 467-8601, Japan

<sup>§</sup>These authors contributed equally to this work

\*Corresponding authors: Dr. Yutaka Enomoto, Laboratory of Cell Growth and Differentiation, Institute of Molecular and Cellular Biosciences, The University of Tokyo; 1-1-1 Yayoi, Bunkyo-ku, Tokyo, 113-0032, Japan; Phone: (+81-3) 5841-7884; Fax: (+81-3) 5841-8475 (email: [yenomoto@iam.u-tokyo.ac.jp](mailto:yenomoto@iam.u-tokyo.ac.jp))

Additional Correspondence: Dr Atsushi Miyajima, Laboratory of Cell Growth and Differentiation, Institute of Molecular and Cellular Biosciences, The University of Tokyo; 1-1-1 Yayoi, Bunkyo-ku, Tokyo, 113-0032, Japan; Phone: (+81-3) 5841-7884; Fax: (+81-3) 5841-8475 (email: [miyajima@iam.u-tokyo.ac.jp](mailto:miyajima@iam.u-tokyo.ac.jp))

**Figure S1. Extracellular HBV DNA secretion in HBV-infected PHHs.**

Cultured media were collected from PHHs on day 3 and 7 after HBV infection. Extracellular HBV DNA was extracted from media and then examined by real-time quantitative PCR.

**Figure S2. Long 3' UTR of human IL-21 mRNA was identified from another donor T cells.**

(A) RT-PCR was performed with RNA of human Th2 cells derived from another donor to detect human IL-21 mRNA. Reverse primers were designed in putative regions of 3' UTR of human IL-21 mRNA. One representative data of three experiments is shown. (B) The 3' end of human IL-21 mRNA was identified by 3' RACE. The forward primer was designed to anneal to the 2463-2484 nt of the 3' UTR. Asterisks indicate non-specific bands.

**Figure S3. Human IL-21 mRNA with the long 3' UTR is a major transcript.**

(A) Black bars indicate the regions amplified by quantitative real-time RT-PCR. (B) Total RNAs derived from human Th1 cells were treated with Deoxyribonuclease I (Invitrogen), and reverse transcribed by using SuperScript VILO cDNA Synthesis Kit (ThermoFisher). Quantitative real-time RT-PCR was performed with primers as follows: 5'-aggaaaccacctccacaaa-3' and 5' -gaatcacatgaaggcatgtt-3' for A1 region and 5' -tgagtctgatgttcagttgctcagt -3' and 5' - cctttctcccctccttctcctt -3' for A2 region. Data are shown as

means  $\pm$  SEM of three independent experiments performed. Fold change indicates the efficiency to the power of the Cq.

**Figure S4. Full-length 3' UTR of human IL-21 mRNA.**

Identified 2602 nucleotides of the long 3'UTR of human IL-21 cDNA were shown. Conserved miRNA binding sites are highlighted in light blue. Major poly A signal sequences, AAUAAA or AUUAAA, are highlighted in green.

**Figure S5. miRNA expressions in EVs derived from HBV-infected PHHs.**

Relative expression levels of EV-miRNAs were examined by quantitative RT-PCR. The expression levels of each miRNA were normalized by total RNA amount of EVs. Bars indicate the means of triplicates.

**Figure S6. Reporter vectors with mutant 3' UTR of human IL-21.**

Reporter vectors with mutant 3' UTR of human IL-21 are shown. Mutations are generated on the complementary site for the seed region of each miRNA.

**Figure S7. Transduction of miRNAs into human Th2 cells.**

Relative expression levels of miRNAs were examined by quantitative real-time RT-PCR at 24 hours after the transfection. The expression levels were normalized to U6. Data are shown

as means + SEM of three independent experiments performed. Statistical significance was determined by one-tailed Welch's t test. \*  $P < 0.05$ , \*\*  $P < 0.01$ .

**Figure S8. Effect of Entecavir on miRNA expressions in EVs derived from HepG2.2.15.7 cells.**

Relative expression levels of EV-miRNAs in HepG2.2,15,7 cells with 0 - 3 nM Entecavir were examined by quantitative RT-PCR. The expression levels of each miRNA were normalized by total RNA amount of EVs. Bars indicate the means of triplicates.

# Figure S1

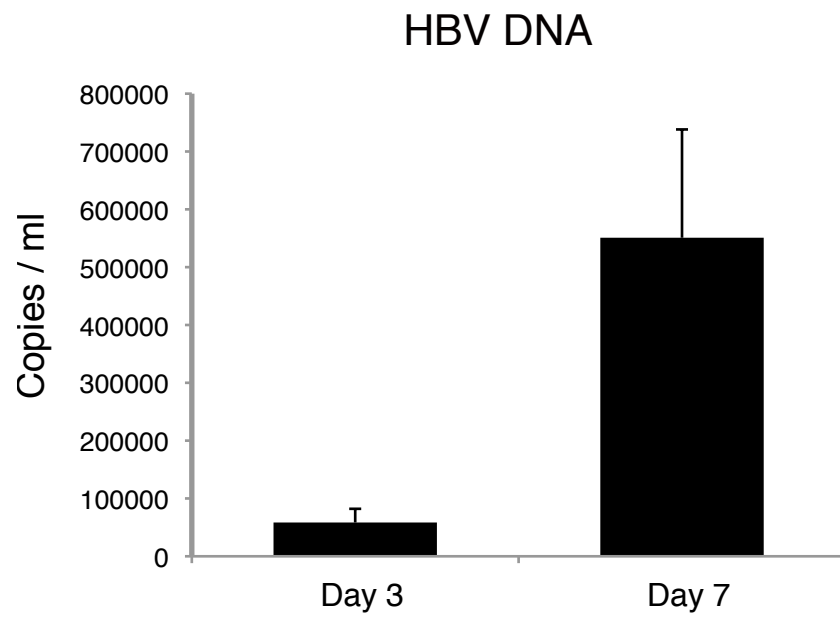

# Figure S2

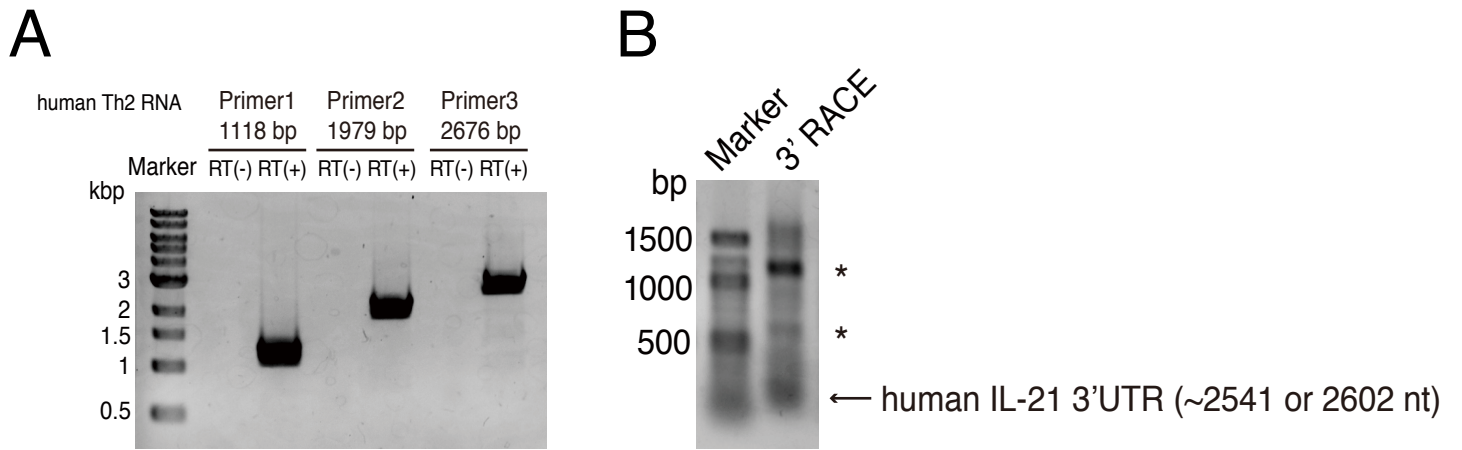

# Figure S3

## A Human IL21 mRNA

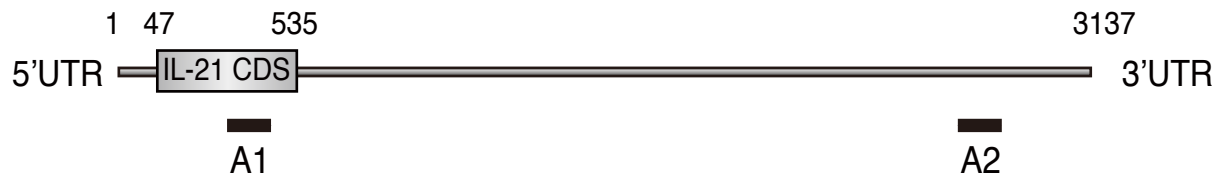

## B

| Amplified region               | Efficiency | Cq                | Fold change ( $\times 10^7$ ) | Relative ratio    |
|--------------------------------|------------|-------------------|-------------------------------|-------------------|
| A1: CDS region<br>(359~426 nt) | 1.961      | 25.14 $\pm$ 0.087 | 2.295 $\pm$ 0.116             | 1.000 $\pm$ 0.048 |
| A2: 3' UTR<br>(2746~2863 nt)   | 2.053      | 23.76 $\pm$ 0.017 | 2.645 $\pm$ 0.033             | 0.864 $\pm$ 0.011 |

## Figure S4

GGATCTAACTTGCAGTTGGACACTATGTTACATACTCTAATATAGTAGTGAAAGTCATTTCTTTGTATTCCA  
AGTGGAGGAGTACAATATATTAGCGATGGGAAAAAAAAAACTCATAAGTGTGCAAAGTCAGGATTATTTCC  
CCATAATCACTATAACAATAGTCTGATTTCTATGTTATTGATTTCTATGACTTCTGAAGTTTTACTTTATCT  
CACTGCCCAACTTTGACATTTCTTGGTTGAAGGAGAAGGCTAAAATTTTTAACCAAAAAATACAGTTTTGAC  
ATCTATTGATTTTATATTAACCTTGAGCTTGATTACCACCAGAATGAGGTCTATTATGATCATAACTTAAAA  
CATATATACCTTCATTCCAGCTGATAATATAGAAGCATAGAAGCAAAATATATAAAAAGCAAAATGAAAAG  
TTGACATCTTTATTCTTTTAAGGAAATGAAAAGTGTGTTTTAAAACTTATATCTGAATAGTTTTTTAAAT  
CTCAGAATGTCTAACATATAAATATGTAATTTATTTATGCACCGGGGATACTAGATGGCTATAAAAAGCCT  
TACTTCTTTATTGGGGTTTATAAAAATATTTAAATACTATAGATATGAATGTATTTATGGAATAGACTCTTA  
GTCAGTGGCAATAGAGTATTAAGAAGTGGATTTAATATTACCTTCTCCAGCCCCAGTCCCCTTATAAGC  
TAACATTTTAAGCTTGTGGAAATGGCAATTTAAACCTATAGAGGGACATATGCCAGGTTGTCTTCTGGAAC  
CAAACATAGTTTTTAAAAGTATTGTAGCTCTCTTCTCAAACCTGTTATAATGATCATATTATGAGCAAGCTAG  
TAACTCCAAATATTTGTCTCTTCTTCTTCTTCTCGTTTCTTTTCTTCTTTTAAAATGAACTTCTGTCT  
TTGACAAAATTTCAACAATGTTTAAACATTTTGGACACTTATAGTTACTATACTTTGGATAAGACAAATTC  
AATCACCTATATAATTTAAAATCAGGAGACAAACCAAGAGGCCAGGACTCCTGTCCAAGTTGAAAACAG  
ACTTTCGCATAAGCATTCCAATCTTTCAGACTTGGGTAGTAAAAACAAGCAACCTACTCTACCTGCCATTT  
CATATCAACTCCAGCACAGCTTGTTTAAACATGAAGTTAAAACCTCTAGAAAAGTAAAATGTTTCGCTAGA  
ATGGTATAAGCTATTTGAGAATCTCTTATTGTAAAATAGTTGTGATTATGCAAGAGGATGTGGGATGAGA  
AATGCTTTATGCTCTGAGAAGAAAAATTATGTGCTTAAAACAATACAGACTTAACCTACAGTTCTAAAA  
GATATATTGAGAATTATTTAATCAAATCTCAATGAAATGTTTTATCATCAGCAAGTAGACTCAGAAAAAA  
GAAAAAAAATTTATCATCAGAAACAAGTACTCTGTTTTAACATTTTAGAATGTATGACAAAGGAAT  
TATGTGCCTGATGATGATAATATATATCTAAAATGTGCCTCAGTTTCAAATACGCCAGCCCGGGTTGTTGT  
GACAAAATGTGGAAGCAGGCACAAAGATAGTGAGAAAGATGGAATCTGTATTTCTTGTCTTGAATGTAT  
AGCTATTAACCTCTTGGATATTGTATTTTCATATTTAAAATAATGTATTTCTTTTGGCATGTTTATTGTTAAAA  
ATTTCTGTTCCAATTATTTTGTATCAGGGTCTCTATCTTAAAAGTAAAAATAACTCAGTGAGGGTTTGGCTA  
AGAGCCTTCATTAACAGAGTTTAAACACCCAGATAAACTCTGCTGTTTAAACCAGAGTTAAACCCACCAG  
CACTCCAGGAAAGGCAATGCATTGGAAATAACAAGATGAAGCAGTGAGACTTGAACAGCTCCATCTTCAC  
TGCTCTATGTTCAAGATGGCCAGTTCTTAAAAGGAATATAAAGATAACCCATAAATAAATGTTTCATCTA  
TGGACAGTAATACAGGAGACGTGAAATTTTGTGACTATGAAATAGTGGTCACTGTTTAAACTCTTTGGGT  
TTCCATTTCTTTATCTGTAGAATGAGAGTGCTGGACTTAATCTCTAATGTCTATTCTTTCTTTTTTAAAGCTT  
TAAATGTCTATGAATATCTAAAGTTCTGGGTATTCTTACAGAAACATCTGATCATACTTCTGAGTAAACT  
TTCTACTGAGTCTGATGTTGAGTTGCTCAGTATTATTTTCAGTAACATTTGTAGCAACACTCACTGCAGGAAC  
AAGGGACATATTCCAAGAAAAAAAAGGAAGGAAGGAAGGAGGGGAGAAAAAGGAAACATTATTATAGGT  
CATGAGAGTTCAGGGAAAATTAATCATGATCTTTATTATTTAGTTCAAAGTGTCTTCTTGGAAACACTGTGA  
TAAAATTGTAGCAATATTATTTCTATATTATTGCTCTGTTGATTTACATATGCATCTGAGAATTTAGCTAAT  
ATGAACTATGTAGTTTATAACTTAATAATTTATTATATATTTGATTTTAAATGTTTCATGTTTATGGCTTC  
TTATTTAAGACCTGATCATATTAATACTACTACCCGCCAGTA



# Figure S5

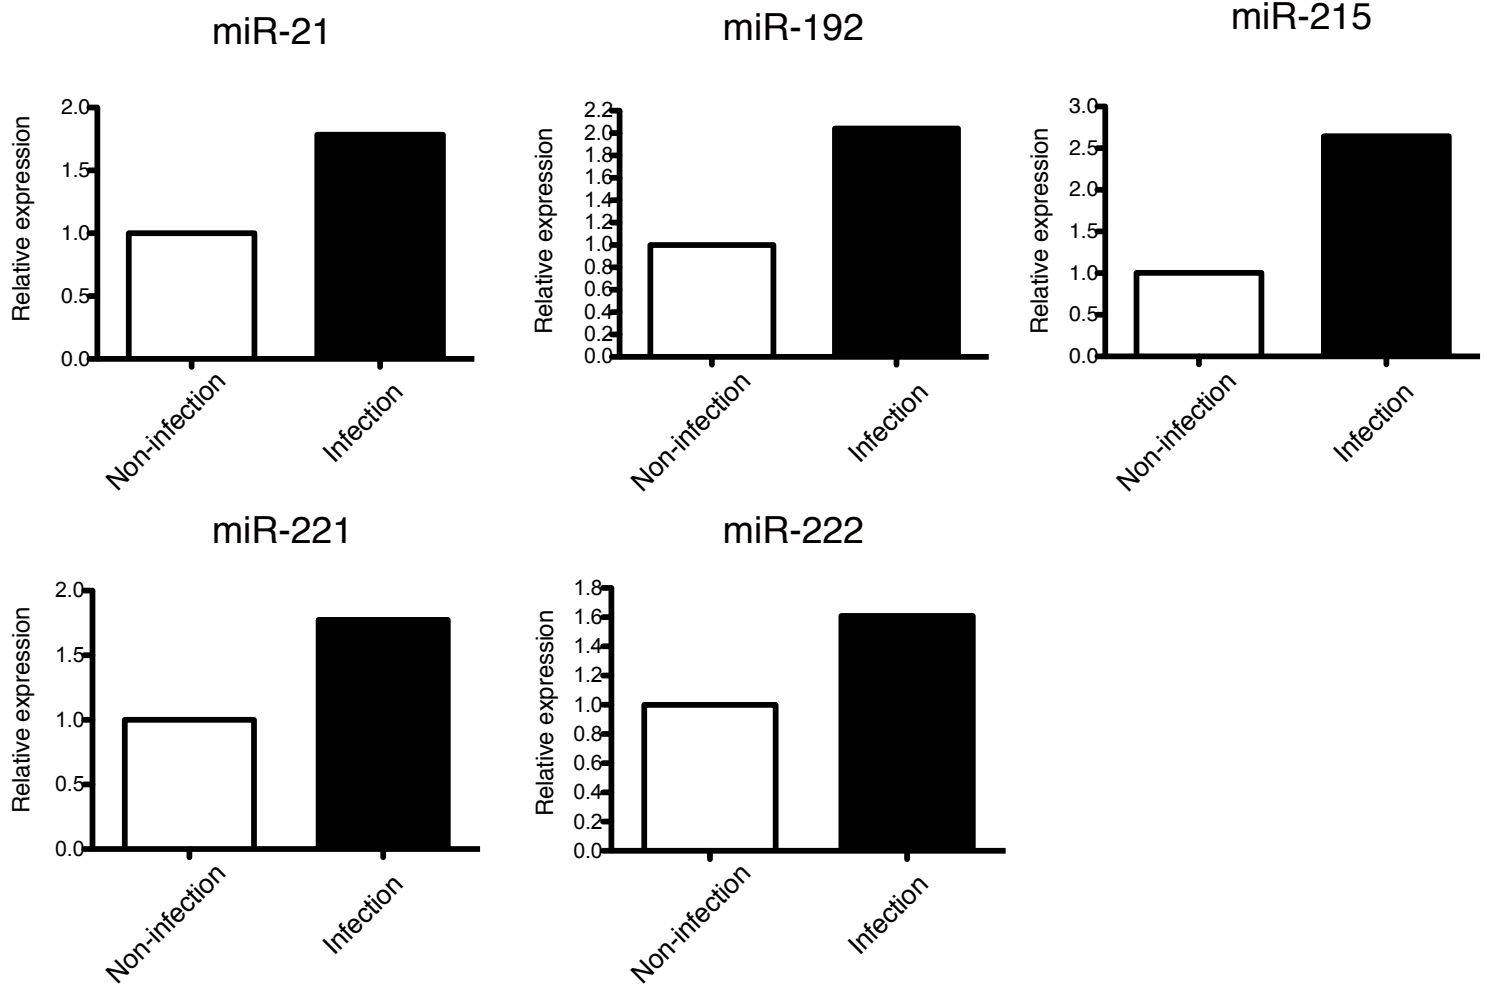

# Figure S6

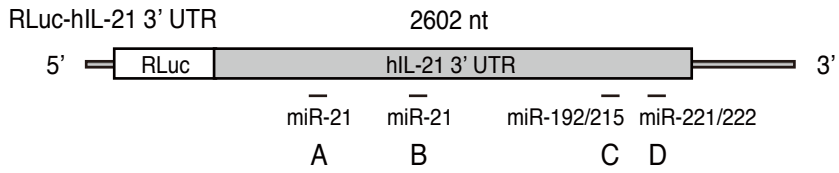

## Mut AB

site A WT 5' ---CAGCCCCCAGUCCCCUUAUAAGCUA---

Mutant 5' ---CAGCCCCCAGUCCCCUUA**CACGA**UA---

site B WT 5' ---UUCGCUAGAAUGGUUAUAAGCUA---

Mutant 5' ---UUCGCUAGAAUGGUUA**CACGA**UA---

## Mut C

site C WT 5' ---GGAAACAUAUUAUAGGUCAU---

Mutant 5' ---GGAAACAUAUUAU**CGAUG**AU---

## Mut D

site D WT 5' ---AACACUUGUAUAAAAUUGUAGCA---

Mutant 5' ---AACACUUGUAUAAAAU**CGCAACA**---

# Figure S7

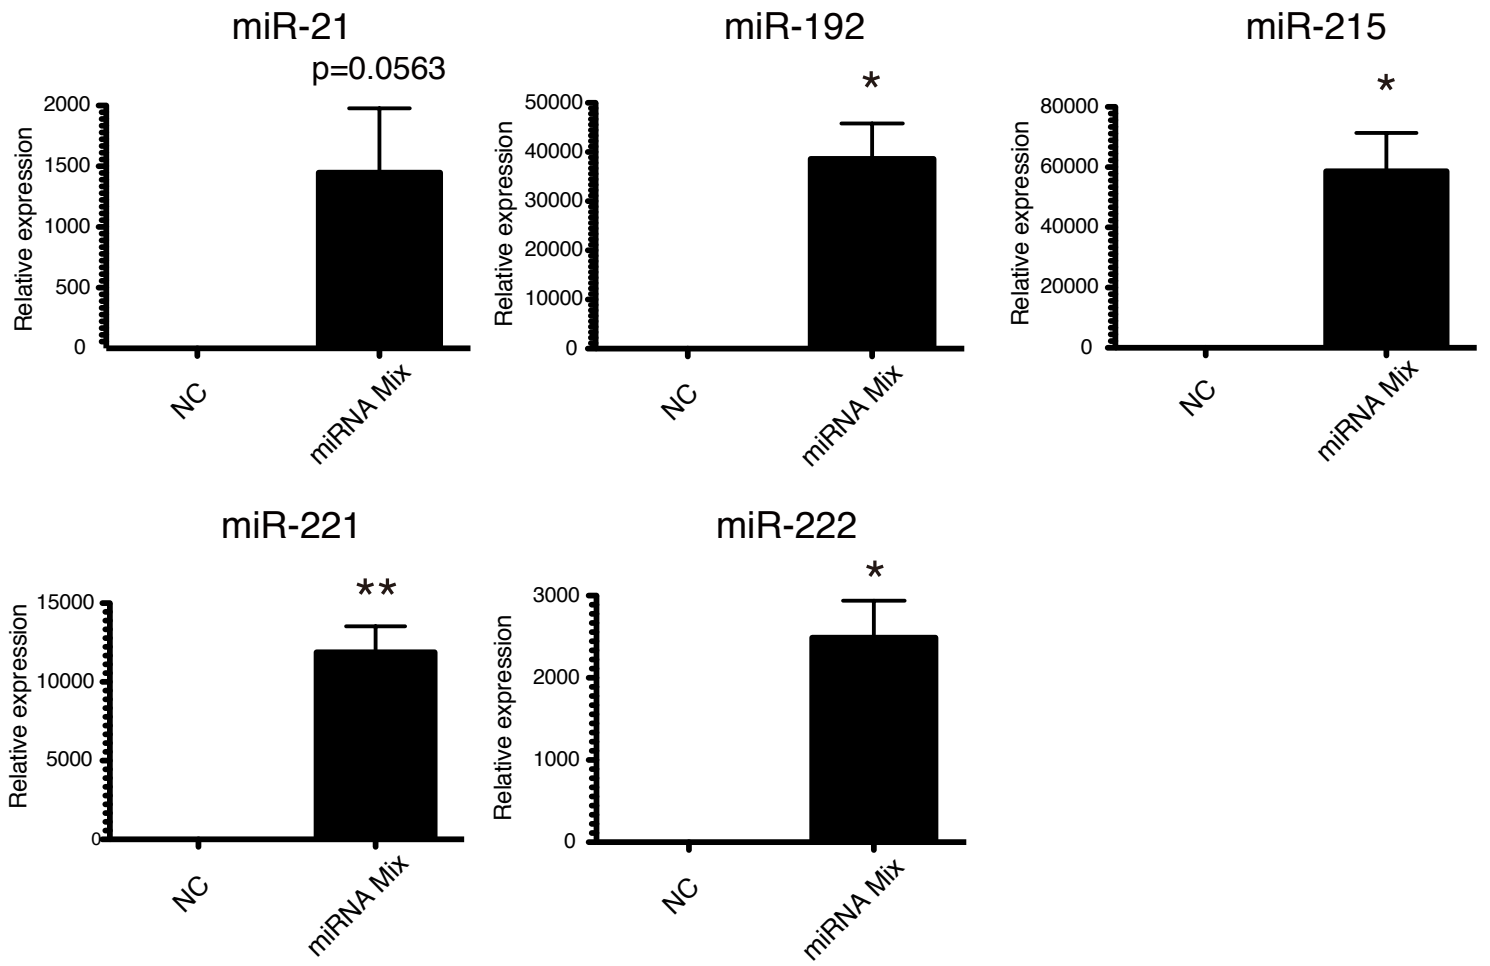

Figure S8

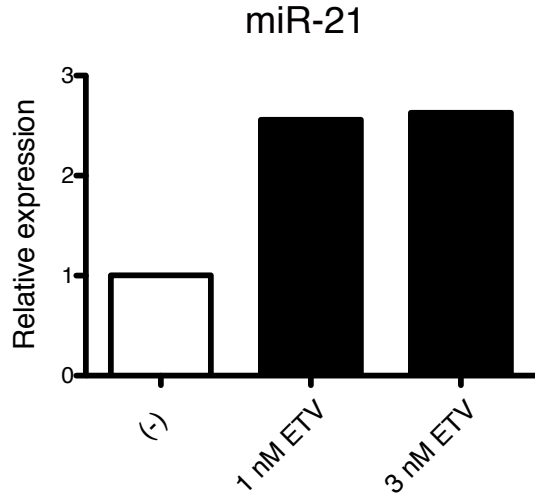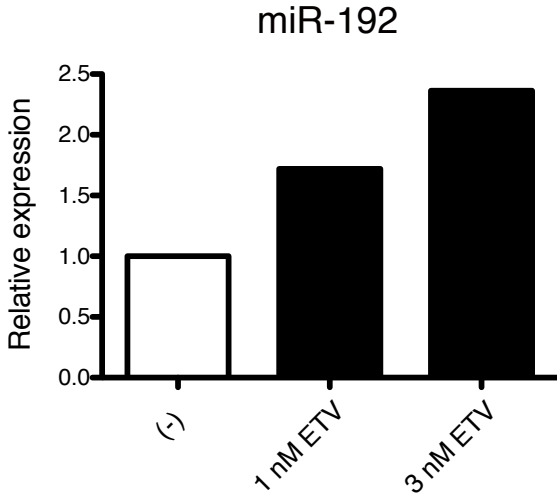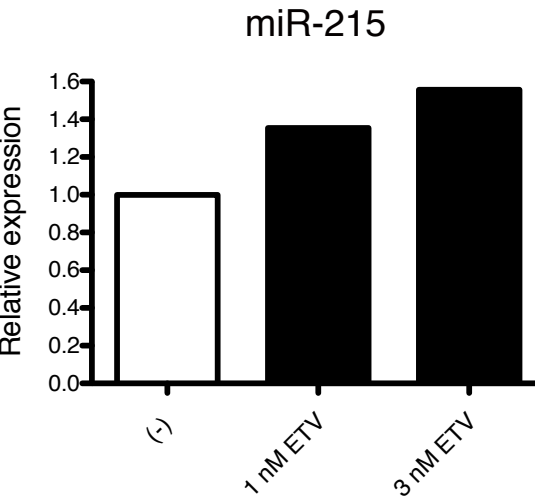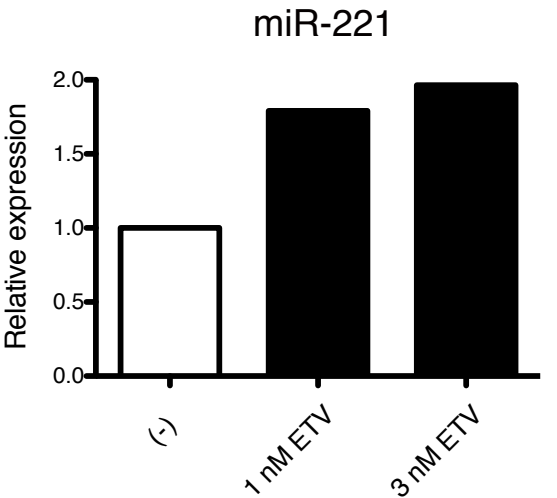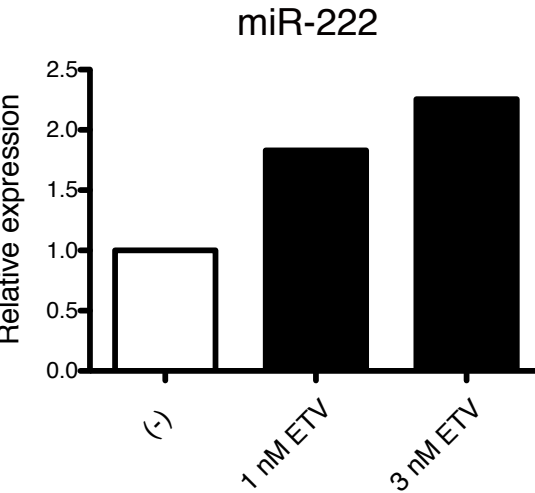

**Table S1. Microarray analysis of EV-miRNAs with HBV infection.**

| Name            | miRbase Accession No. | Infection | Non-infection | Fold change |
|-----------------|-----------------------|-----------|---------------|-------------|
| hsa-miR-378d    | MIMAT0018926          | 125.2     | 21.8          | 5.73        |
| hsa-miR-3678-3p | MIMAT0018103          | 91.3      | 21.1          | 4.33        |
| hsa-miR-411*    | MIMAT0004813          | 97.0      | 22.9          | 4.23        |
| hsa-miR-30e     | MIMAT0000692          | 324.7     | 77.0          | 4.22        |
| hsa-miR-106a    | MIMAT0000103          | 597.0     | 143.6         | 4.16        |
| hsa-miR-378e    | MIMAT0018927          | 98.1      | 23.7          | 4.14        |
| hsa-miR-16      | MIMAT0000069          | 709.4     | 176.1         | 4.03        |
| hsa-miR-221     | MIMAT0000278          | 156.2     | 39.5          | 3.96        |
| hsa-miR-3687    | MIMAT0018115          | 138.6     | 36.3          | 3.82        |
| hsa-miR-215     | MIMAT0000272          | 498.5     | 132.1         | 3.77        |
| hsa-miR-19b     | MIMAT0000074          | 934.6     | 247.8         | 3.77        |
| hsa-miR-378i    | MIMAT0019074          | 142.8     | 39.2          | 3.64        |
| hsa-miR-21      | MIMAT0000076          | 2021.7    | 561.5         | 3.60        |
| hsa-miR-192     | MIMAT0000222          | 1756.9    | 489.8         | 3.59        |
| hsa-miR-27b     | MIMAT0000419          | 1161.7    | 326.0         | 3.56        |
| hsa-miR-513a-5p | MIMAT0002877          | 920.4     | 261.8         | 3.52        |
| hsa-miR-658     | MIMAT0003336          | 1043.9    | 300.2         | 3.48        |
| hsa-miR-320e    | MIMAT0015072          | 182.1     | 52.7          | 3.46        |
| hsa-miR-34a     | MIMAT0000255          | 210.6     | 63.4          | 3.32        |
| hsa-miR-148a    | MIMAT0000243          | 608.5     | 183.9         | 3.31        |
| hsa-miR-494     | MIMAT0002816          | 708.5     | 216.0         | 3.28        |
| hsa-miR-30b     | MIMAT0000420          | 734.3     | 224.6         | 3.27        |
| hsa-miR-222     | MIMAT0000279          | 113.5     | 34.9          | 3.26        |
| hsa-let-7c      | MIMAT0000064          | 907.0     | 279.2         | 3.25        |
| hsa-miR-4792    | MIMAT0019964          | 603.2     | 188.3         | 3.20        |
| hsa-miR-27a     | MIMAT0000084          | 612.3     | 192.2         | 3.19        |
| hsa-miR-99a     | MIMAT0000097          | 441.0     | 139.0         | 3.17        |
| hsa-miR-17      | MIMAT0000070          | 459.8     | 147.8         | 3.11        |
| hsa-miR-22      | MIMAT0000077          | 2683.4    | 863.5         | 3.11        |
| hsa-miR-20a     | MIMAT0000075          | 388.1     | 125.6         | 3.09        |
| hsa-miR-320d    | MIMAT0006764          | 144.8     | 47.1          | 3.07        |
| hsa-miR-122     | MIMAT0000421          | 13282.7   | 4372.0        | 3.04        |
| hsa-miR-30a     | MIMAT0000087          | 379.0     | 125.7         | 3.02        |
| hsa-miR-320b    | MIMAT0005792          | 194.0     | 64.5          | 3.01        |
| hsa-let-7i      | MIMAT0000415          | 86.5      | 28.8          | 3.00        |
| hsa-miR-29a     | MIMAT0000086          | 769.2     | 259.1         | 2.97        |
| hsa-miR-15a     | MIMAT0000068          | 290.8     | 99.2          | 2.93        |
| hsa-miR-107     | MIMAT0000104          | 299.6     | 103.9         | 2.88        |
| hsa-miR-26a     | MIMAT0000082          | 1062.5    | 369.4         | 2.88        |
| hsa-let-7d      | MIMAT0000065          | 784.8     | 273.1         | 2.87        |
| hsa-miR-30d     | MIMAT0000245          | 626.1     | 218.2         | 2.87        |
| hsa-miR-152     | MIMAT0000438          | 61.0      | 21.3          | 2.86        |
| hsa-miR-4632    | MIMAT0019688          | 63.4      | 22.3          | 2.84        |
| hsa-miR-151b    | MIMAT0010214          | 91.5      | 32.4          | 2.82        |
| hsa-miR-92b     | MIMAT0003218          | 379.4     | 134.8         | 2.81        |
| hsa-miR-92a     | MIMAT0000092          | 628.2     | 223.7         | 2.81        |
| hsa-miR-378c    | MIMAT0016847          | 155.9     | 56.1          | 2.78        |
| hsa-miR-3679-5p | MIMAT0018104          | 1422.2    | 520.9         | 2.73        |
| hsa-miR-100     | MIMAT0000098          | 588.9     | 215.8         | 2.73        |
| hsa-miR-24      | MIMAT0000080          | 2574.7    | 952.1         | 2.70        |
| hsa-miR-101     | MIMAT0000099          | 58.7      | 21.9          | 2.68        |
| hsa-miR-193a-3p | MIMAT0000459          | 78.4      | 29.3          | 2.68        |
| hsa-miR-191     | MIMAT0000440          | 337.9     | 126.5         | 2.67        |
| hsa-miR-2113    | MIMAT0009206          | 99.6      | 37.3          | 2.67        |
| hsa-miR-135a*   | MIMAT0004595          | 57.8      | 21.8          | 2.65        |
| hsa-miR-29b     | MIMAT0000100          | 221.9     | 85.1          | 2.61        |
| hsa-miR-26b     | MIMAT0000083          | 438.1     | 169.2         | 2.59        |

|                 |              |         |         |      |
|-----------------|--------------|---------|---------|------|
| hsa-miR-4459    | MIMAT0018981 | 2511.8  | 981.6   | 2.56 |
| hsa-miR-106b    | MIMAT0000680 | 125.7   | 49.2    | 2.55 |
| hsa-miR-125b    | MIMAT0000423 | 609.5   | 240.4   | 2.53 |
| hsa-miR-422a    | MIMAT0001339 | 139.7   | 55.1    | 2.53 |
| hsa-miR-3135b   | MIMAT0018985 | 2731.0  | 1078.7  | 2.53 |
| hsa-miR-30c     | MIMAT0000244 | 805.3   | 322.9   | 2.49 |
| hsa-miR-23a     | MIMAT0000078 | 947.9   | 380.1   | 2.49 |
| hsa-miR-320c    | MIMAT0005793 | 159.5   | 64.0    | 2.49 |
| hsa-miR-4638-5p | MIMAT0019695 | 1231.4  | 496.3   | 2.48 |
| hsa-let-7a      | MIMAT0000062 | 912.4   | 367.8   | 2.48 |
| hsa-miR-15b     | MIMAT0000417 | 133.4   | 54.3    | 2.46 |
| hsa-miR-103a    | MIMAT0000101 | 342.1   | 139.5   | 2.45 |
| hsa-miR-3714    | MIMAT0018165 | 418.0   | 170.9   | 2.45 |
| hsa-miR-4324    | MIMAT0016876 | 257.1   | 105.2   | 2.44 |
| hsa-miR-4476    | MIMAT0019003 | 898.8   | 368.1   | 2.44 |
| hsa-miR-451     | MIMAT0001631 | 108.2   | 44.8    | 2.42 |
| hsa-miR-185     | MIMAT0000455 | 51.1    | 21.2    | 2.41 |
| hsa-miR-23a*    | MIMAT0004496 | 68.7    | 28.6    | 2.40 |
| hsa-miR-20b     | MIMAT0001413 | 282.3   | 117.5   | 2.40 |
| hsa-miR-4741    | MIMAT0019871 | 1553.6  | 647.8   | 2.40 |
| hsa-miR-194     | MIMAT0000460 | 1222.0  | 510.6   | 2.39 |
| hsa-let-7b      | MIMAT0000063 | 588.1   | 252.2   | 2.33 |
| hsa-miR-214     | MIMAT0000271 | 123.8   | 53.4    | 2.32 |
| hsa-miR-3616-3p | MIMAT0017996 | 814.7   | 355.8   | 2.29 |
| hsa-miR-4481    | MIMAT0019015 | 83.4    | 36.9    | 2.26 |
| hsa-miR-19a     | MIMAT0000073 | 132.4   | 58.9    | 2.25 |
| hsa-miR-23b     | MIMAT0000418 | 1283.1  | 571.4   | 2.25 |
| hsa-miR-365*    | MIMAT0009199 | 2242.5  | 999.4   | 2.24 |
| hsa-miR-126     | MIMAT0000445 | 203.3   | 92.3    | 2.20 |
| hsa-miR-2392    | MIMAT0019043 | 340.4   | 154.5   | 2.20 |
| hsa-miR-29c     | MIMAT0000681 | 71.3    | 32.6    | 2.19 |
| hsa-miR-1307    | MIMAT0005951 | 433.5   | 200.5   | 2.16 |
| hsa-miR-198     | MIMAT0000228 | 100.4   | 46.6    | 2.15 |
| hsa-miR-1908    | MIMAT0007881 | 30516.0 | 14289.2 | 2.14 |
| hsa-miR-1973    | MIMAT0009448 | 60.5    | 28.4    | 2.13 |
| hsa-miR-1203    | MIMAT0005866 | 57.8    | 27.2    | 2.12 |
| hsa-miR-4484    | MIMAT0019018 | 17541.8 | 8271.4  | 2.12 |
| hsa-miR-4257    | MIMAT0016878 | 1669.2  | 791.7   | 2.11 |
| hsa-miR-4787-5p | MIMAT0019956 | 39264.1 | 18748.0 | 2.09 |
| hsa-miR-4749-5p | MIMAT0019885 | 5361.0  | 2582.4  | 2.08 |
| hsa-miR-4505    | MIMAT0019041 | 2678.0  | 1293.3  | 2.07 |
| hsa-miR-122*    | MIMAT0004590 | 424.3   | 205.9   | 2.06 |
| hsa-miR-93      | MIMAT0000093 | 123.6   | 60.0    | 2.06 |
| hsa-miR-130a    | MIMAT0000425 | 116.4   | 56.6    | 2.05 |
| hsa-miR-125a-5p | MIMAT0000443 | 137.9   | 67.6    | 2.04 |
| hsa-miR-921     | MIMAT0004971 | 176.4   | 86.5    | 2.04 |
| hsa-miR-4467    | MIMAT0018994 | 26648.6 | 13076.4 | 2.04 |

---

**Table S2. Expression levels of EV-miRNAs with HBV infection at day 2.**

| Name        | miRbase Accession No. | Infection | Non-infection | Fold change |
|-------------|-----------------------|-----------|---------------|-------------|
| hsa-miR-21  | MIMAT0000076          | 1822.5    | 768.9         | 2.37        |
| hsa-miR-192 | MIMAT0000222          | 1843.7    | 1079.7        | 1.71        |
| hsa-miR-215 | MIMAT0000272          | 424.1     | 287.2         | 1.48        |
| hsa-miR-221 | MIMAT0000278          | 122.6     | 76.1          | 1.61        |
| hsa-miR-222 | MIMAT0000279          | 88.2      | 41.5          | 2.13        |
